# Supplementary material for: miR-15b-5p resensitizes colon cancer cells to 5-fluorouracil by promoting apoptosis via the NF-κB/XIAP axis
Source: PubMed Central journal article supplement (PMC5482850; doi:10.1038/s41598-017-04172-z), 2017-06-23
Supplement: 41598_2017_4172_MOESM1_ESM.pdf [file 41598_2017_4172_MOESM1_ESM.pdf]

## miR-15b-5p resensitizes colon cancer cells to 5-fluorouracil by promoting apoptosis via the NF- $\kappa$ B/XIAP axis

Ci Zhao,<sup>1,2</sup> Qi Zhao,<sup>1,2</sup> Chunhui Zhang,<sup>1</sup> Guangyu Wang,<sup>1</sup> Yuanfei Yao,<sup>1</sup> Xiaoyi Huang,<sup>2,3</sup> Fei Zhan,<sup>1</sup> Yuanyuan Zhu,<sup>1</sup> Jiaqi Shi,<sup>1</sup> Jianan Chen,<sup>1</sup> Feihu Yan,<sup>1</sup> Yanqiao Zhang.<sup>1</sup>

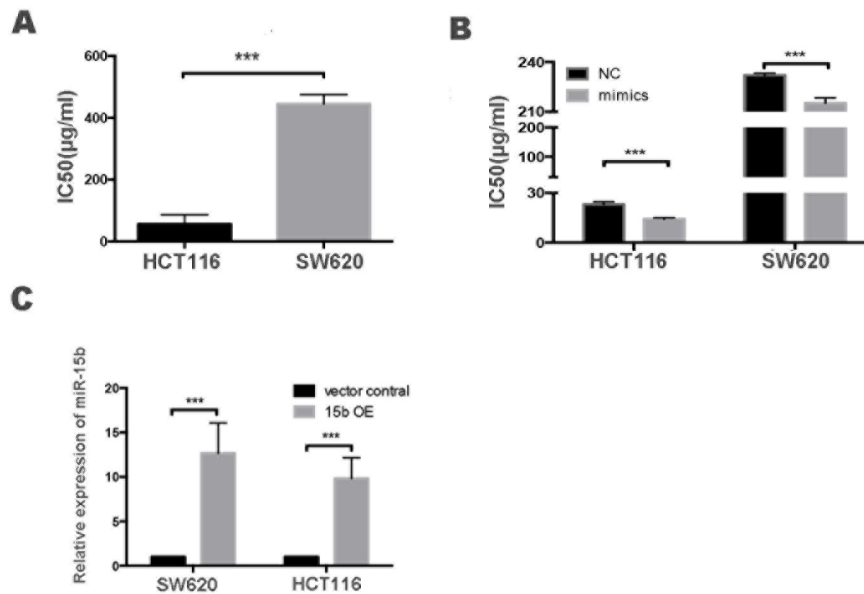

**Figure S1. IC<sub>50</sub>.** (A) IC<sub>50</sub>s of 5-Fu in SW620 and HCT116 cells based on the Luminescent Cell Viability Assay data after 48 hours of 5-Fu treatment ( $p < 0.0001$ ). (B) The IC<sub>50</sub>s of mimic groups compared with those of NC groups in HCT116 ( $p = 0.0008$ ) and SW620 ( $p = 0.0002$ ) cells. (C) The expression of miR-15b-5p was assessed by RT-qPCR in SW620/15b OE and HCT116/15b OE cells ( $*p < 0.05$ ,  $**p < 0.01$ ,  $***p < 0.001$ ).

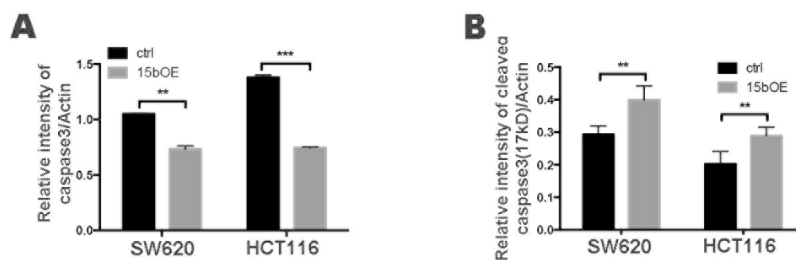

**Figure S2. Densitometric analysis of Figure 3C.** Caspase 3 (A) and cleaved caspase 3(17kD) (B) levels increased in miR-15b OE cells treated with 5-Fu. Semi-quantitative data from densitometric analysis are presented as relative ratios of each protein to actin.

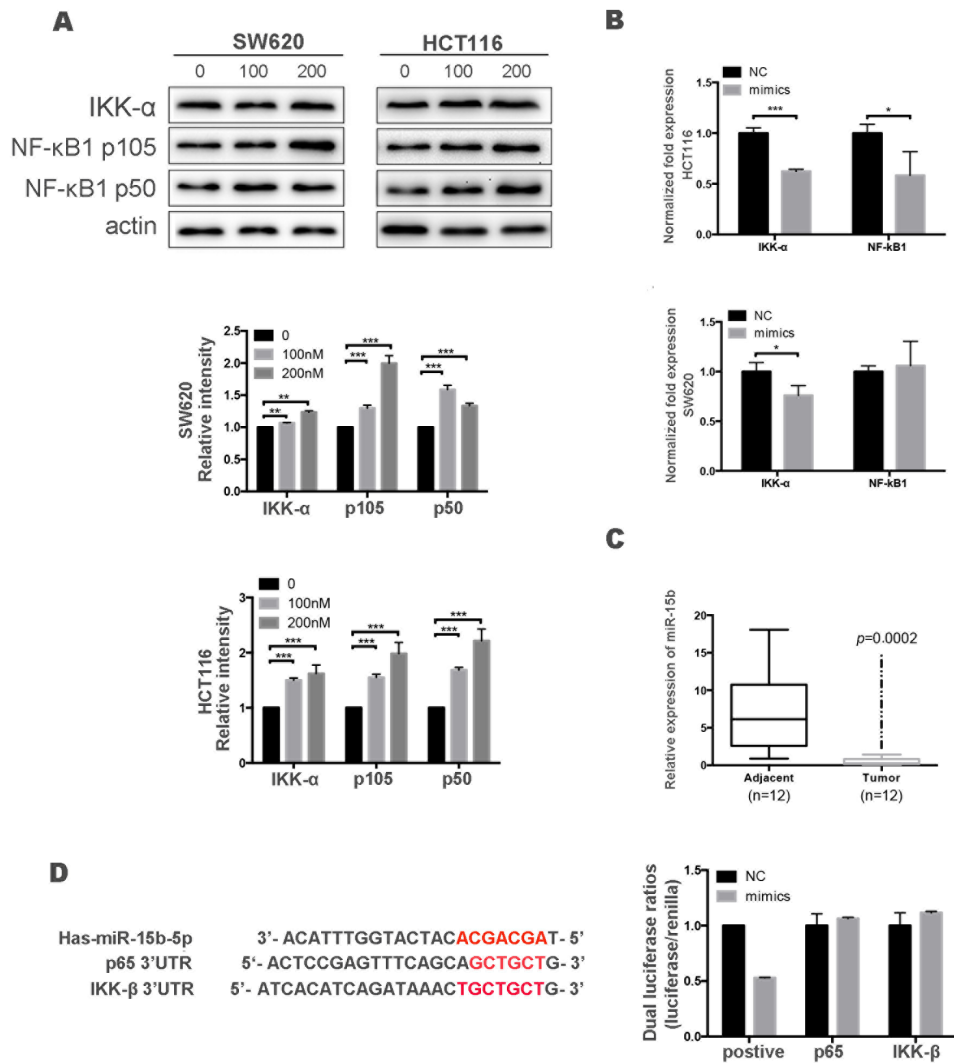

**Figure S3. The supplement figure for Figure 4.** (A) miR-15b-5p inhibitors can increase the protein expression levels of NF- $\kappa$ B1 and IKK- $\alpha$ , and the effect was dose-dependent. (B) A scheme showing the miR-15b-5p putative binding sites in the 3'-UTR of *p65* or *IKK- $\beta$*  mRNA. miR-15b-5p mimic and the pMIR-p65-3'UTR or pMIR-*IKK- $\beta$*  -3'UTR vector was co-transfected with in HEK293T cells. The relative luciferase activity was measured. (C) The expression levels of *NF- $\kappa$ B1* and *IKK- $\alpha$*  mRNA were assessed by RT-qPCR in SW620 and HCT116 cells. (D) The expression of miR-15b-5p was assessed by RT-qPCR in 12 pairs of primary colorectal cancer tissues and their adjacent normal tissues.

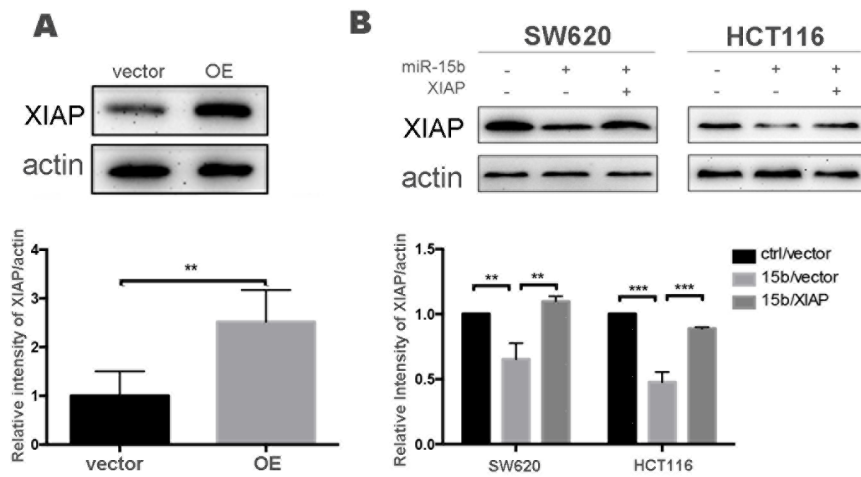

**Figure S4. The protein expression of XIAP and semi-quantitative analysis.** (A) Expression of XIAP after recombinant plasmid transfection were assessed by western blotting in HEK293T cells. (B) Expression of XIAP after co-transfection with the miR-15b-5p and *XIAP* expression vectors before 5-FU treatment in SW620 or HCT116 cells. Three such experiments were quantified by measuring the intensity of XIAP relative to the Actin (loading) control.
